# Supplementary material
Source: PubMed Central journal article supplement (PMC4067697)
Supplement: NIHMS582550-supplement-Supplemental_Data.pdf [file NIHMS582550-supplement-Supplemental_Data.pdf]

| Supplemental<br>table 1 | Haplotype Frequencies |        |     |     |                   |     |     |               |       |       |       |      | Correlation<br>(-347/-1066) |
|-------------------------|-----------------------|--------|-----|-----|-------------------|-----|-----|---------------|-------|-------|-------|------|-----------------------------|
|                         | -347 (rs7130929)      |        |     |     | -1066 (rs4537731) |     |     | f(-347/-1066) |       |       |       |      |                             |
|                         | N                     | C/C    | C/A | A/A | T/T               | T/C | C/C | f(CT)         | f(AC) | f(CC) | f(AT) |      |                             |
| <b>All Ethnicities</b>  |                       |        |     |     |                   |     |     |               |       |       |       |      |                             |
| Controls                | 495                   | 204    | 225 | 66  | 175               | 208 | 76  | 0.60          | 0.36  | 0.03  | 0.00  | 0.93 |                             |
| IBS                     | 422                   | 159    | 199 | 64  | 132               | 150 | 68  | 0.58          | 0.39  | 0.03  | 0.00  | 0.94 |                             |
| p-value                 |                       | 0.2389 |     |     | 0.519             |     |     | 0.62          | 0.38  | 0.31  |       |      |                             |
| <b>Caucasian</b>        |                       |        |     |     |                   |     |     |               |       |       |       |      |                             |
| Controls                | 247                   | 94     | 116 | 37  | 91                | 108 | 34  | 0.61          | 0.38  | 0.00  | 0.00  | 0.99 |                             |
| IBS                     | 303                   | 108    | 143 | 52  | 99                | 111 | 50  | 0.58          | 0.41  | 0.01  | 0.00  | 0.99 |                             |
| p-value                 |                       | 0.442  |     |     | 0.383             |     |     | 0.52          | 0.676 | 0.39  |       |      |                             |
| <b>Hispanic</b>         |                       |        |     |     |                   |     |     |               |       |       |       |      |                             |
| Controls                | 59                    | 22     | 30  | 7   | 21                | 28  | 8   | 0.61          | 0.37  | 0.02  | 0.00  | 0.96 |                             |
| IBS                     | 25                    | 12     | 12  | 1   | 8                 | 9   | 1   | 0.72          | 0.28  | 0.00  | 0.00  | 1.00 |                             |
| p-value                 |                       | 0.221  |     |     | 0.367             |     |     | 0.243         | 0.56  | 0.99  |       |      |                             |
| <b>Asian</b>            |                       |        |     |     |                   |     |     |               |       |       |       |      |                             |
| Controls                | 77                    | 49     | 22  | 6   | 45                | 17  | 6   | 0.78          | 0.22  | 0.00  | 0.00  | 1.00 |                             |
| IBS                     | 19                    | 13     | 6   | 0   | 13                | 4   | 0   | 0.84          | 0.16  | 0.00  | 0.00  | 1.00 |                             |
| p-value                 |                       | 0.418  |     |     | 0.252             |     |     | 0.80          | 0.80  |       |       |      |                             |
| <b>African American</b> |                       |        |     |     |                   |     |     |               |       |       |       |      |                             |
| Controls                | 83                    | 26     | 46  | 11  | 43                | 23  | 10  | 0.40          | 0.41  | 0.19  | 0.00  | 0.61 |                             |
| IBS                     | 43                    | 15     | 19  | 9   | 14                | 13  | 11  | 0.39          | 0.43  | 0.18  | 0.00  | 0.71 |                             |
| p-value                 |                       | 0.745  |     |     | 0.819             |     |     | 0.99          | 0.76  | 0.69  |       |      |                             |

**Supplemental Figure S1.** Allele-specific binding of EGR-1 to the -347C/A polymorphism in the *TPH1* core promoter. EMSA analysis using nuclear extract (NE\*) from BON cells stimulated with TPA (1 h, 200 nM). Binding reactions were performed with allele-specific probes (-347C and -347A) and included antibodies (Ab) against SP1, SP3, ZBP-89, or GATA1. *Open arrow*: allele-specific binding.

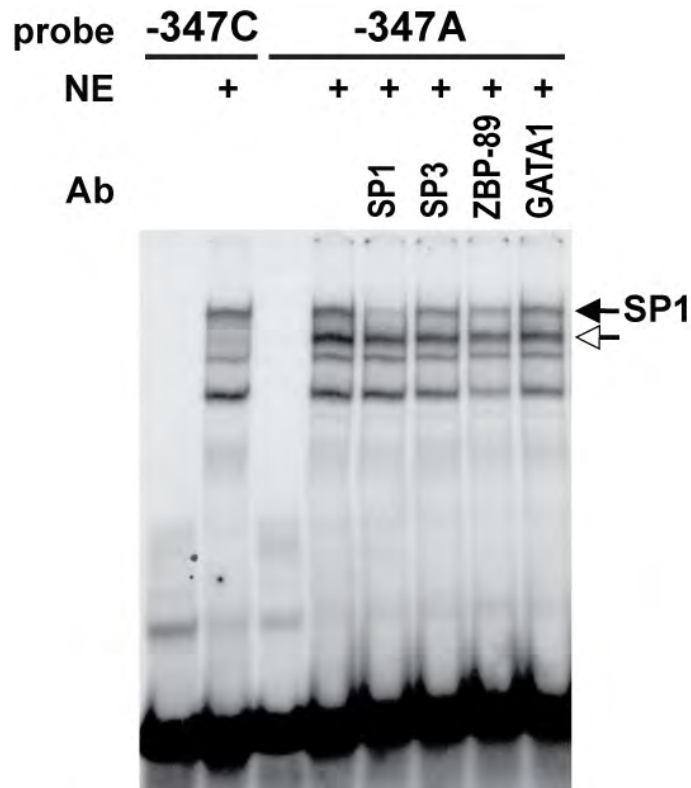

!
